# Supplementary material for: Rapid production and characterization of antimicrobial colicins using Escherichia coli-based cell-free protein synthesis
Source: PubMed Central journal article supplement — Synth Biol (Oxf). 2018 Jun 6;3(1):ysy004. doi: 10.1093/synbio/ysy004 (PMC7445778; doi:10.1093/synbio/ysy004), 2018-06-06
Supplement: ysy004_supp.pdf [file ysy004_supp.pdf]

## Supplementary Information

### Rapid Production and Characterization of Antimicrobial Colicins Using *Escherichia coli*-based Cell-Free Protein Synthesis

Xing Jin,<sup>1</sup> Weston Kightlinger,<sup>2</sup> Yong-Chan Kwon,<sup>3</sup> and Seok Hoon Hong<sup>1,\*</sup>

<sup>1</sup>Department of Chemical and Biological Engineering,  
Illinois Institute of Technology, Chicago, IL 60616, USA

<sup>2</sup>Department of Chemical and Biological Engineering,  
Northwestern University, Evanston, IL 60208, USA

<sup>3</sup>Department of Biological and Agricultural Engineering, LSU Agricultural Center,  
Louisiana State University, Baton Rouge, LA 70803, USA

\*Corresponding author: shong26@iit.edu

Tel: (+1) 312 567 8950

**Supplementary Table S1.** All primers used in this study. ‘\*’ indicates phosphorothioated bases.

| Primer   | Purpose                                          | Sequence (5' → 3')                                                                               |
|----------|--------------------------------------------------|--------------------------------------------------------------------------------------------------|
| pJL1-F   | pJL1 backbone for Gibson                         | CAAAGCCCGAAAGGAAGCTGAGTTG                                                                        |
| pJL1-R   | Assembly                                         | CTTAAAGTTAAACAAAATTATTTCTAGAGGG                                                                  |
| Gacol-F  | Amplification of <i>cma</i> gene                 | TTTGTTTAACTTTAAGAAGGAGATATACATATG                                                                |
| Gacol-R  | encoding colicin M                               | TTCCTTTCGGGCTTTGTTAGCAGCCGGTTCGACTTA                                                             |
| ColE1-F  | Amplification of <i>cea</i> gene                 | ATTTTGTTTAACTTTAAGAAGGAGATATACATATGGAAACCGCGGTAGCGTAC                                            |
| ColE1-R  | encoding colicin E1                              | CGGGCTTTGTTAGCAGCCGGTTCGACTTATTTTTTCGAACTGCGGATGGCTCCAAATC<br>CCTAACACCTCATTTATAG                |
| ColE2-F  | Amplification of <i>col</i> gene                 | ATTTTGTTTAACTTTAAGAAGGAGATATACATATGAGCGGTGGCGATGGACG                                             |
| ColE2-R  | encoding colicin E2                              | CGGGCTTTGTTAGCAGCCGGTTCGACTTATTTTTTCGAACTGCGGATGGCTCCACTTA<br>CCCCGATGAATATCAATATG               |
| Colla-F  | Amplification of <i>cia</i> gene                 | ATTTTGTTTAACTTTAAGAAGGAGATATACATATGTCTGACCCTGTACGTATTAC                                          |
| Colla-R  | encoding colicin Ia                              | CGGGCTTTGTTAGCAGCCGGTTCGACTTATTTTTTCGAACTGCGGATGGCTCCAAATA<br>CCCCAGAACTTATTCG                   |
| E2Imm-F  | Amplification of <i>imm</i> gene                 | ATTTTGTTTAACTTTAAGAAGGAGATATACATATGGAAGTAAACATAG                                                 |
| E2Imm-R  | encoding E2 immunity                             | CGGGCTTTGTTAGCAGCCGGTTCGACTCATTTTTTCGAACTGCGGATGGCTCCAGCCC<br>TGTTTAAATCC                        |
| T7Mega-F | T7 promoter addition                             | A*G*ATCTCGATCCCGCGAAATTAATACGACTCACTATAGGGAGACCACAACGGTT<br>TCCCTCTAGAAATAATTTTGTTTAACTTTAAGAAGG |
| TAA-R    | Addition of overlap region<br>with T7 terminator | TATTGCTCAGCGGTGGCAGCAGCCAACCTCAGCTTCCTTTCGGGCTTTGTTAGCAGC<br>CGG                                 |
| T7Mega-R | T7 terminator addition                           | T*A*ATCAGAATTGGCTTTCAGCAAAAAACCCCTCAAGACCCGTTTAGAGGCCCA<br>AGGGGTATGCTAGTTATTGCTCAGCGGTGGCAGC    |
| T7-Pro   | Sequence checking for                            | TAATACGACTCACTATAGGG                                                                             |
| T7-Ter   | colicin amplification                            | GCTAGTTATTGCCTCAGCGG                                                                             |

**Supplementary Table S2.** DNA sequences of all colicin genes used in this study. T7 promoter, terminator, translocation domain, receptor-binding domain, and cytotoxicity domain are highlighted as blue, red, turquoise, yellow, and green, respectively. Bolded lowercase characters indicate Strep-tag sequences.

| Name                   | Size (bp) | Sequence 5' → 3'                                                                                                                                                                                                                                                                                                                                                                                                                                                                                                                                                                                                                                                                                                                                                                                                                                                                                                                                                                                                                                                                                                                                                                                                                                                                                                                                                                                                                                                                                                                                                              |
|------------------------|-----------|-------------------------------------------------------------------------------------------------------------------------------------------------------------------------------------------------------------------------------------------------------------------------------------------------------------------------------------------------------------------------------------------------------------------------------------------------------------------------------------------------------------------------------------------------------------------------------------------------------------------------------------------------------------------------------------------------------------------------------------------------------------------------------------------------------------------------------------------------------------------------------------------------------------------------------------------------------------------------------------------------------------------------------------------------------------------------------------------------------------------------------------------------------------------------------------------------------------------------------------------------------------------------------------------------------------------------------------------------------------------------------------------------------------------------------------------------------------------------------------------------------------------------------------------------------------------------------|
| <i>cm</i> encoding M   | 1073      | <p>AGATCTCGATCCCGCGAAAT <b>TAATACGACTCACTATAGGGAG</b> ACCACAACGGTTTCCCTCTAGAAATAATTTTGTT<br/>           TAACTTTAAGAAGGAGATATACAT <b>ATGGAAACCTTAACTGTTTCATGCACCATCACCATCAACTAACTTACCAAGTT</b><br/> <b>ATGGCAATGGTGCATTTTCTCTTTTCAGCACCGCATGTTCTTGGTGCTGGACCT</b> <b>CTTTTAGTCCAGGTTGTTTATAG</b><br/> <b>TTTTTCCAGAGTCCAAACATGTGTCTTCAGGCTTTAACTCAACTTGAGGATTACATCAAAAAACATGGGGCTAGC</b><br/> <b>AACCCTCTCACATTGCAGATCATATCGACAAATATTGGTTACTTCTGTAACGCCGACCGAAATCTGGTTCTTCACC</b><br/> <b>CTGGAATAAGCGTTTATGACGCTTACCCTTCTCAAACAGCGCCAAGTCAATATGACTATCGCTCAATGAATAT</b><br/> <b>GAAACAAATGAGCGGTAATGTCACTACACCAATTGTGGCGCTTGCTCACTATTTATGGGGTAAT</b> <b>GGCGCTGAAAGG</b><br/> <b>AGCGTTAATATCGCCAACATTGGTCTTAAAAATTTCCCCTATGAAAATTAATCAGATAAAAAGACATTATAAAATCTG</b><br/> <b>GTGTAGTAGGTACATTCCCTGTTTCTACAAAGTTCACACATGCCACTGGTGATTATAATGTTATTACCGGTGCATA</b><br/> <b>TCTTGGTAATATCACACTGAAAACAGAAGGTACTTTAACTATCTCTGCCAATGGCTCCTGGACTTACAATGGCGTT</b><br/> <b>GTTTCGTTTCATATGATGATAAATACGATTTTAAACGCCAGCACTCACCGTGGCGTCATCGGAGAGTCGCTCACAAAGGC</b><br/> <b>TCGGGGCGATGTTTTCTGGTAAAGAGTACCAGATACTGCTTCCCTGGTGAAATTCACATTAAGAAAGTGGTAAGCG</b><br/> <b>A<b>tg</b>gagccatccgagttcgaaaa<b>TA</b>A</b> <b>GT</b>CGACCGGCTGCTAACAAAGCCCGAAAGGAAGCTGAGTTGGCTGCTG<br/>           CCACCGCTGAGCAATAACTAGCAT <b>AACCCCTTGGGGCCTCTAAACGGGTCTTGAGGGGTTTTT</b> <b>I</b>GCTGAAAGCCAA<br/>           TTCTGATTA</p>                                                                                                                                                                              |
| <i>cia</i> encoding Ia | 2138      | <p>AGATCTCGATCCCGCGAAAT <b>TAATACGACTCACTATAGGGAG</b> ACCACAACGGTTTCCCTCTAGAAATAATTTTGTT<br/>           TAACTTTAAGAAGGAGATATACAT <b>ATGTCTGACCCTGTACGTATTACAAATCCCGGTGCAGAATCGCTGGGGTATG</b><br/> <b>ATTCAGATGGCCATGAAATTATGGCCGTTGATATTTATGTAAACCCTCCACGTGTCGATGTCTTTCATGGTACCCC</b><br/> <b>GCCTGCATGGAGTTCCTTCGGGAACAAAACCATCTGGGGCGGAAACGAGTGGGTTGATGATTCCCCAACCCGAAGT</b><br/> <b>GATATCGAAAAAAGGGACAAGGAAATCACAGCGTACAAAAACACGCTCAGCGCGCAGCAGAAAGAGAATGAGAATA</b><br/> <b>AGCGTACTGAAGCCGGAACGCCTCTCTGCGGCGATTGCTGCAAGGGAAAAAGATGAAAAACACTGAAAACACT</b><br/> <b>CCGTGCCGGAACGCAGATGCCGCTGATATTACACGACAGGAGTTCAGACTCCTGCAGGCAGAGCTGAGAGAATAC</b><br/> <b>GGATTCCGTACTGAAATCGCCGATATGACGCCCTCCGGCTGCATACAGAGAGCCGGATGCTGTTTGCTGATGCTG</b><br/> <b>ATTCTCTTCGTATATCTCCCCGGGAGGCCAGGTCGTTAATCGAACAGGCTGAAAAACGGCAGAAGGATGCGCAGAA</b><br/> <b>CGCAGACAAGAAGCCGCTGATATGCTTGTGAATACGAGCGCAGAAAAGGTATTCTGGACACCCGGTTGTCAGAG</b><br/> <b>CTGGAAAAAATGGCGGGGCAGCCCTTGCCGTTCTTGATGCACAACAGGCCCTCTGCTCGGGCAGCAGACACGGA</b><br/> <b>ATGACAGGGCCATTTCAGAGGCCCGGAATAAACTCAGTTCAGTGACGGAATCGCTTAACACGGCCCGTAATGCATT</b><br/> <b>AACCAGAGCTGAACAACAGCTGACGCAACAGAAAAACACGCCTGACGGCAAAACGATAGTTTCCCCTGAAAAATTC</b><br/> <b>CCGGGGCGTTCATCAACAAATGATTCTATTGTTGTGAGCGGTGATCCGAGATTTGCCGGTACGATAAAAAATCACAA</b><br/> <b>CCAGCGCAGTCATCGATAACCGTGCAACCTGAATTATCTTCTGAGCCATTCGGTCTGGACTATAAACGCAATAT</b><br/> <b>TCTGAATGACCGGAATCCGGTGGTGACAGAGGATGTGGAAGGTGACAAGAAAATTTATAATGCTGAAGTTGCTGAA</b><br/> <b>TGGGATAAGTTACGGCAAGATTGCTTGATGCCAGAAAATAAAATCACCTCTGCTGAATCTGCGGTAAATTCGGCGA</b></p> |

GAAATAACCTCAGTGCCAGAACAATGAGCAAAAGCATGCAAATGACGCTCTTAATGCCCTGTTGAAGGAAAAAGA  
GAATATCCGTAACCAGCTTTCGGGCATCAATCAGAAGATAGCGGAAGAGAAAAAGAAAACAGGATGAACTGAAGGCA  
ACGAAAGACGCAATTAATTTCAACAACAGAGTTCCTGAAATCAGTTTCAGAAAAATATGGTGCAAAGCTGAGCAGT  
TAGCCAGAGAGATGGCCGGCAGGCTAAAGGGAAGAAAATACGTAATGTTGAAGAGGCATTA AAAACGTATGAAAA  
GTACCGGGCTGACATTAACAAAAAATTAATGCAAAGATCGTGACGCGATTGCCGCAGCCCTTGAGTCTGTGAAG  
CTGTCTGATATATCGTCTAATCTGAACAGATTTCAGTCGGGGACTGGGATATGCAGGAAAATTTACAAGTCTTGCTG  
ACTGGATCACTGAGTTTGGTAAGGCTGTCCGGACAGAGAACTGGCGTCTCTTTTTGTTAAAACAGAAACCATCAT  
AGCAGGCAATGCCGCAACGGCTCTTGTGGCACTGGTCTTCAGTATTCTTACCGGAAGCGCTTTAGGCATTATCGGG  
TATGGTTTACTGATGGCTGTCACCGGTGCGCTGATTGATGAATCGCTTGTGGAAAAAGCGAATAAGTTCTGGGGTA  
TT**tgagacca****ccgcagttcgaaaa**TAA**GTCGACCGGCTGCTAACAAAGCCC**GAAAGGAAGCTGAGTTGGCTGCT  
GCCACCGCTGAGCAATAACTAGCAT**AACCCCTTGGGGCCTCTAAACGGGTCTTGAGGGGTTTTT**GCTGAAAGCCA  
ATTCTGATTA

*cea* encoding 1826  
E1

AGATCTCGATCCCGCGAAAT**TAATACGACTCACTATAGGGAG**ACCACAACGGTTTCCCTCTAGAAATAATTTTGT  
TAACTTTAAGAAGGAGATATACATATGGAAACCGCGGTAGCGTACTATAAAGATGGTGTTCCTTATGATGATAAGG  
GACAGGTAATTATTACTCTTTTGAATGGTACTCCTGACGGGAGTGGCTCTGGCGGGCGGAGGTGGAAAAGGAGGCAG  
TAAAAGTGAAAGTTCTGCAGCTATTCATGCAACTGCTAAATGGTCTACTGCTCAATTAAGAAAACACAGGCAGAG  
CAGGCTGCCCGGGCAAAGCTGCAGCGGAAGCACAGGCGAAAGCAAAGGCAAACAGGGATGCGCTGACTCAGCGCC  
TGAAGGATATCGTGAATGAGGCTCTTCGTCACAATGCCTCACGTACGCCTTCAGCAACAGAGCTTGCTCATGCTAA  
TAATGCAGCTATGCAGGCGGAAGACGAGCGTTTGCGCCTTGCGAAAGCAGAAGAAAAGCCCGTAAAGAAGCGGAA  
GCAGCAGAAAAGGCTTTTCAGGAAGCAGAACAACGACGTAAAGAGATTGAACGGGAGAAGGCTGAAACAGAAGCC  
AGTTGAAACTGGCTGAAGCTGAAGAGAAACGACTGGCTGCATTGAGTGAAGAAGCTAAAGCT**GTTGAGATCGCCCA**  
AAAAAACTTTCTGCTGCACAATCTGAAGTGGTGA AAAATGGATGGAGAGATTAAGACTCTCAATTCTCGTTAAGC  
TCCAGTATCCATGCCCGTGATGCAGAAATGAAAACGCTCGCTGGAAAACGAAATGAACTGGCTCAGGCATCCGCTA  
AATATAAAGAACTGGATGAGCTGGTCAAAAACTATCACCAAGAGCCAATGATCCGCTTCAGAACCCTCTTTTTT  
TGAAGCAACCAGACGACGGGTGGGGCCGGTAAGATTAGAGAAGAAAACAAAAACAGGTAACAGCATCAGAAACA  
CGTATTAACCGGATAAATGCTGATATAACTCAGATCCAGAAGGCTATTTCTCAGGTCAGTAATAATCGTAATGCCG  
GTATCGCTCGTGTTTCATGAAGCTGAAGAAAAATTTGAAAAAGCACAG**AAATAATCTCCTTAATTCACAGATTAAGGA**  
TGCTGTTGATGCAACAGTTAGCTTTTATCAAACGCTGACTGAAAAATATGGTGAAAAATATTCGAAAATGGCACAG  
GAACTTGCTGATAAGTCTAAAGTAAGAAAATCGGCAATGTGAATGAAGCTCTCGCTGCTTTTGAAAAATACAAGG  
ATGTTTTAAATAAGAAATTCAGCAAAGCCGATCGTGATGCTATTTTTAATGCGTTGGCATCGGTGAAGTATGATGA  
CTGGGCTAAACATTTAGATCAGTTTGCCAAGTACTTGAAGATTACGGGGCATGTTTCTTTTGGATATGATGTGGTA  
TCTGATATCCTAAAAATTAAGGATACAGGTGACTGGAAGCCACTATTTCTTACATTAGAGAAGAAAGCTGCAGATG  
CAGGGGTGAGTTATGTTGTTGCTTTACTTTTTAGCTTGCTTGCTGGAACCTACATTAGGTATTTGGGGTATTGCTAT  
TGTTACAGGAATCTATGCTCCTATATTGATAAGAATAAACTTAATACTATAAATGAGGTGTTAGGGATT**tgagac**  
**ca****ccgcagttcgaaaa**TAA**GTCGACCGGCTGCTAACAAAGCCC**GAAAGGAAGCTGAGTTGGCTGCTGCCACCGC  
TGAGCAATAACTAGCAT**AACCCCTTGGGGCCTCTAAACGGGTCTTGAGGGGTTTTT**GCTGAAAGCCAATTCGAT  
TA

---

|                     |      |                                                                               |                                                         |                                     |
|---------------------|------|-------------------------------------------------------------------------------|---------------------------------------------------------|-------------------------------------|
| <i>col</i> encoding | 2003 | AGATCTCGATCCCGCGAAAT                                                          | TAATACGACTCACTATAGGGAG                                  | ACCACAACGGTTTTCCCTCTAGAAATAATTTTGTT |
| E2                  |      | TAACHTTAAGAAGGAGATATACATATGAGCGGTGGCGATGGACGCGGCCATAACACGGGCGCGCATAGCACAAAGTG |                                                         |                                     |
|                     |      | GTAACATTAATGGTGGCCCGACCGGGCTTGGTGTAGGTGGTGGTCTTCTGATGGTTCCGGGTGGAGTTCGGAAAA   |                                                         |                                     |
|                     |      | TAACCCGTGGGGTGGTGGTTCGGGTAGCGGCATTCCTGGGGTGGTGGTTCGGTTCATGGTAATGGCGGGGGGAAT   |                                                         |                                     |
|                     |      | AGTAATTCGGTGGTGGCTCGGGAACAGGCGGTAATCTGTCAGCAGTAGCTGCGCCAGTGGCATTGGTTTTCCGG    |                                                         |                                     |
|                     |      | CACHTTCCACTCCAGGAGCTGGCGGTCTGGCGGTGAGTATTTAGCGGGAGCATTATCGGCAGCTATTGCTGATAT   |                                                         |                                     |
|                     |      | TATGGCTGCCCTGAAAGGACCGTTTTAAATTTGGTCTTTGGGGGTGGCTTTATATGGTGTATTGCCATCACAAATA  |                                                         |                                     |
|                     |      | GCGAAAGATGACCCCAATATGATGTCAAAGATTGTGACGTCATTACCCGAGATGATATTACTGAATCACCTGTCA   |                                                         |                                     |
|                     |      | GTTTATTACCTCTCGATAAGGCAACAGTAAACGTAAATGTTCTGTTGTTGATGATGTAAAAGACGAACGACAGAA   |                                                         |                                     |
|                     |      | TATTTCCGGTGTTCAGGTGTTCCGATGAGTGTTCGGTGGTTGATGCAAAACCTACCGAACGTCCAGGTGTTTTT    |                                                         |                                     |
|                     |      | ACGGCATCAATTCCAGGTGCACCTGTTCTGAATATTTAGTTAATAACAGTACGCCAGCAGTACAGACATTAAGCC   |                                                         |                                     |
|                     |      | CAGGTGTTACAAATAATACTGATAAGGATGTTCCGCCGGCAGGATTTACTCAGGTGGTAATACCAGGGATGCAGT   |                                                         |                                     |
|                     |      | TATTCGATTCCCAGGACAGCGGTGATAATGCCGTATATGTTTCAGTGAAGTGTCTTAGCCCTGACCAGGTA       |                                                         |                                     |
|                     |      | AAACAACGTCAGGATGAAGAAAATCGCCGTCAGCAGGAATGGGATGCTACGCATCCGGTTGAAGCGGCTGAGCGAA  |                                                         |                                     |
|                     |      | ATTATGAACGCGCGCGTGCAGAGCTGAATCAGGCAAATGAAGATGTTGCCAGAAATCAGGAGCGACAGGCTAAAGC  |                                                         |                                     |
|                     |      | TGTTTCAAGTTTATAATTCGCGTAAAAGCGAACTTGATGCAGCGAATAAAACTCTTGCTGATGCAATAGCTGAAATA |                                                         |                                     |
|                     |      | AAACAATTTGATCGATTTGCCATGACCCAATGGCTGGCGGTACAGAAATGTGGCAAATGGCCGGGCTTAAAGCCC   |                                                         |                                     |
|                     |      | AGCGGGCGCAGACGGATGTAAATAATAAGCAGGCTGCATTTGATGCTGCTGCAAAAGAGAAGTCAAGTCTGATGC   |                                                         |                                     |
|                     |      | TGCATTAAGTGCCGCGCAGGAGCGCCGCAAACAGAAGGAAAATAAAGAAAAGGACGCTAAGGATAAATTAGATAAG  |                                                         |                                     |
|                     |      | GAGAGTAAACGGAATAAGCCA                                                         | GGGAAGGCGACAGGTAAAGGTAAACCAGTTGGTGATAAATGGCTGGATGATGCAG |                                     |
|                     |      | GTAAAGATTCAGGAGCGCCAATTCAGATCGCATTGCTGATAAGTTGCGTGATAAAGAATTTAAAAACTTTGACGA   |                                                         |                                     |
|                     |      | TTTCCGGAAGAAATCTGGGAAGAAGTGTCAAAGATCCCGATCTTAGTAAGCAATTTAAAGGCAGTAATAAGACG    |                                                         |                                     |
|                     |      | AACATTCAAAAGGGAAAAGCACHTTTGCAAGGAAGAAAGACCAAGTAGGTGGTAGGGAACGCTTTGAATTACATC   |                                                         |                                     |
|                     |      | ATGATAAACCAATCAGTCAGGATGGTGGTGTCTATGATATGAATAATATCAGAGTGACCACACCTAAGCGACATAT  |                                                         |                                     |
|                     |      | TGATATTCATCGGGGTAAG                                                           | tgagccatccgcagttogaaaa                                  | TAA                                 |
|                     |      | AAGCTGAGTTGGCTGCTGCCACCGCTGAGCAATAACTAGCAT                                    | AACCCCTTGGGGCCTCTAAACGGGTCTTGAGGGG                      |                                     |
|                     |      | TTTTT                                                                         | GCTGAAAGCCAATTCGATTA                                    |                                     |

---

**Supplementary Table S3.** Effective multiplicity of colicin Ia, E1, and E2 after exposing cells to each colicin with different concentrations for 3 mins and 1 h. Multiplicity ( $m$ ) was calculated using the formula ( $S/S_0 = e^{-m}$ ), where  $S$  is the number of surviving cells after colicin treatment and  $S_0$  is the number of untreated cells.

| Concentration (ng/mL) | 3 min treatment |      |     | 1 h treatment |      |      |
|-----------------------|-----------------|------|-----|---------------|------|------|
|                       | Ia              | E1   | E2  | Ia            | E1   | E2   |
| 2                     | 0.2             | 0.7  | 0.2 | 0.3           | 0.0  | 0.1  |
| 4                     | 0.2             | 1.3  | 0.2 | 0.2           | 0.0  | 0.6  |
| 8                     | 0.3             | 3.2  | 0.4 | 0.3           | 0.6  | 1.8  |
| 16                    | 0.4             | 4.0  | 0.8 | 0.2           | 1.6  | 3.5  |
| 32                    | 1.1             | 6.4  | 0.6 | 0.5           | 4.7  | 3.5  |
| 64                    | 1.1             | 11.3 | 3.6 | 1.0           | 6.4  | 9.6  |
| 128                   | 1.4             | 12.6 | 4.3 | 1.5           | 11.2 | 10.8 |
| 256                   | 1.3             | 12.9 | 4.7 | 1.6           | 11.6 | 11.3 |
| 512                   | 1.0             | 13.2 | 4.9 | 1.6           | 12.2 | 12.0 |
| 1,024                 | 1.3             | 13.3 | 4.7 | 1.3           | 12.2 | 12.0 |

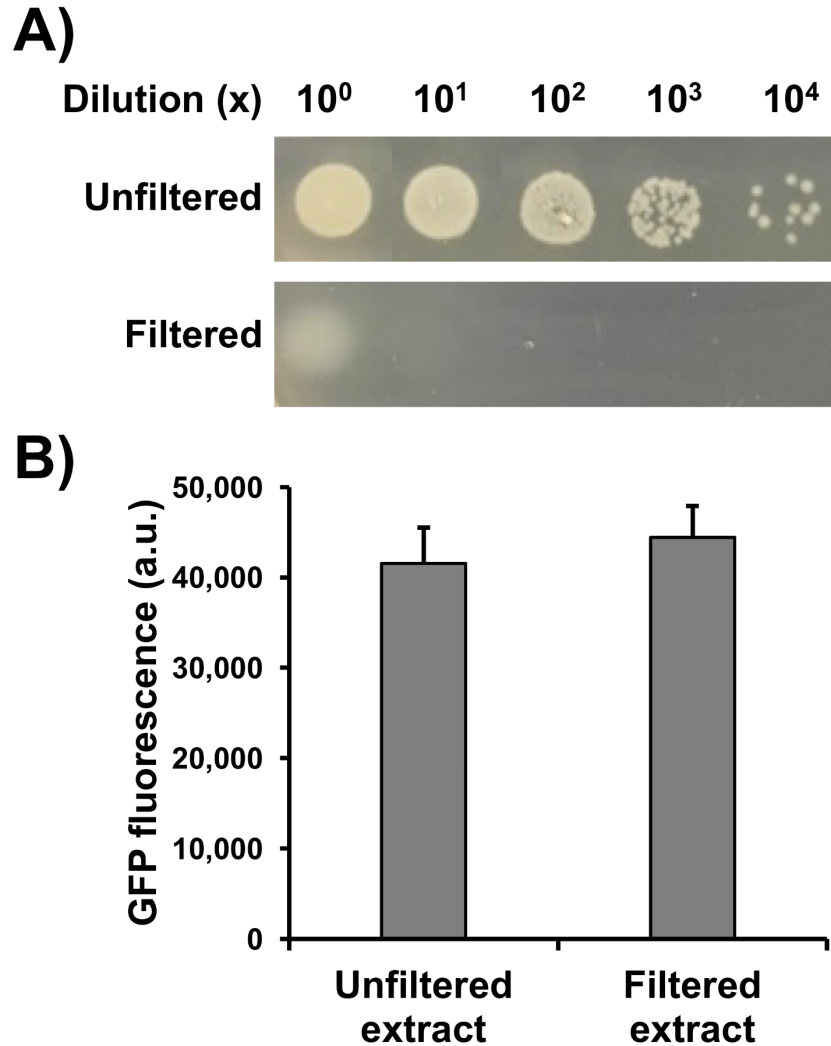

**Supplementary Figure S1. Assessment of ‘cell-free’ crude extract.** (A) The number of cells in the unfiltered and filtered crude extracts were examined with a serial dilution followed by addition of 10  $\mu$ L of each sample onto a nutrient agar plate. (B) Green fluorescent protein (GFP) production was assessed with unfiltered and filtered extracts after incubating at 37°C for 20 h. Error bars indicate standard deviations from two independent batch reactions with three well replicates each.

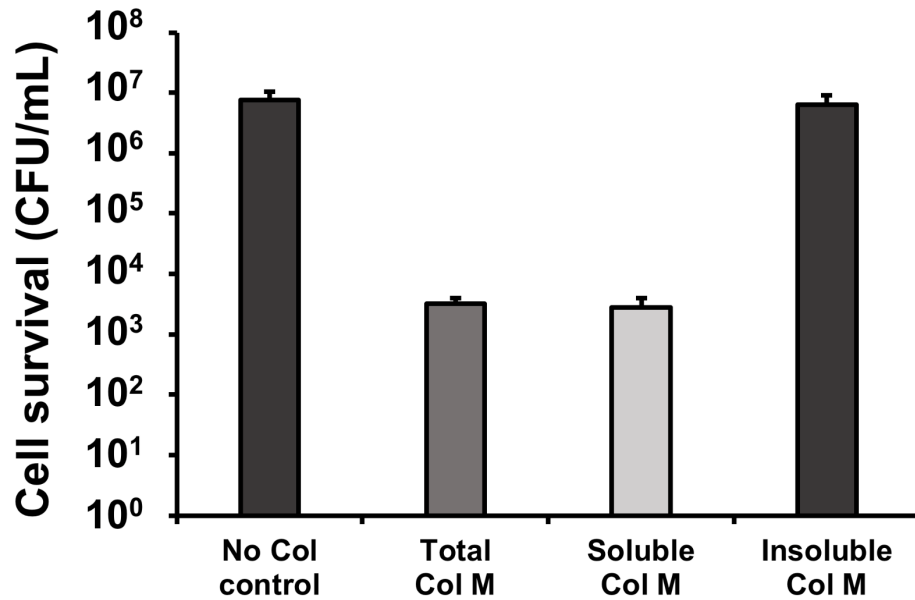

**Supplementary Figure S2. Cell viability assay of colicin M.** K361 cells (initial cell density of  $5 \times 10^6$  CFU/mL) were exposed to cell-free synthesized total colicin M (1,500 ng/mL), soluble M (90 ng/mL), and insoluble M (1,390 ng/mL) for 1 h at 37°C at 220 rpm in LB medium. Error bars indicate standard deviations from two independent cultures with three plating replicates each.



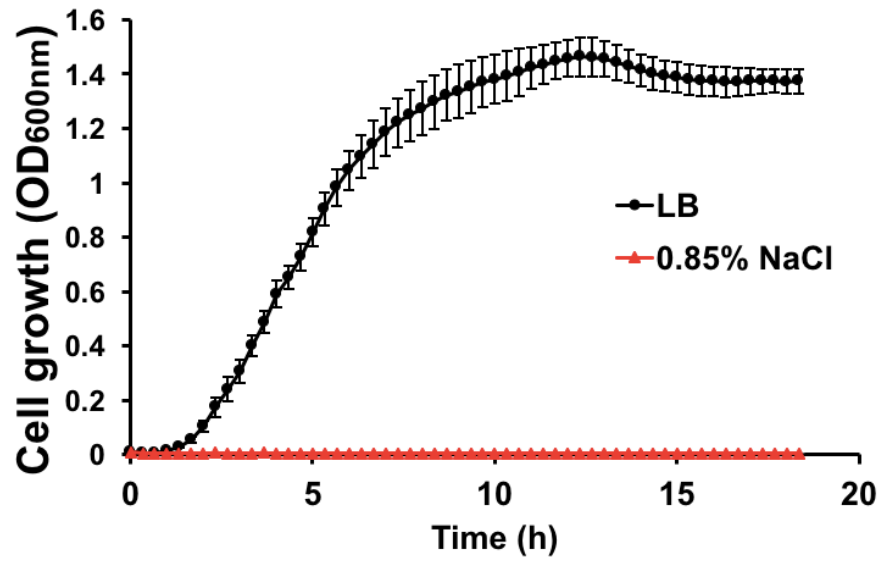

**Supplementary Figure S3. Cell growth of K361 strain.** Overnight K361 cell culture was diluted to OD<sub>600nm</sub> 0.01 in LB medium or 0.85% NaCl solution, and 200  $\mu$ L of the adjusted culture was incubated at 37°C with continuous shaking in a 96-well plate. Cell growth was measured every 20 min. Error bars indicate standard deviations from two independent starter cultures with three well replicates each.

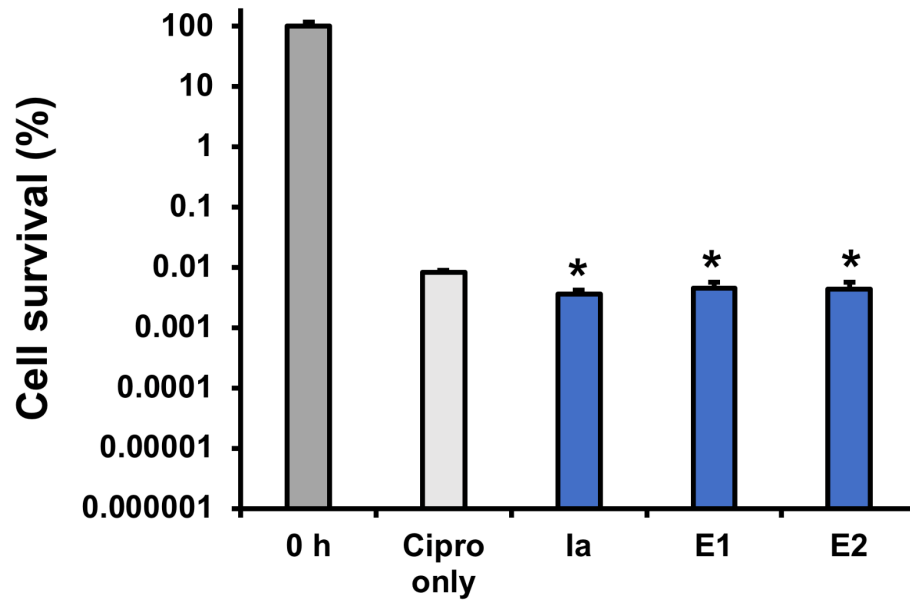

**Supplementary Figure S4. Persister assay in the presence of ciprofloxacin and colicins with the same multiplicity.** Exponential phase cells were exposed to ciprofloxacin (Cipro, 5  $\mu\text{g}/\text{mL}$ ) and different colicins that share the same effective multiplicity ( $m \sim 1.6$ ) for 3 h with shaking at 220 rpm at 37°C. Concentrations of Ia, E1, and E2 were 512 ng/mL, 16 ng/mL, and E2 8 ng/mL, respectively (**Supplementary Table S3**). Error bars indicate standard deviations from two independent cultures with three plating replicates each. \* represents significant difference compared to Cipro only treated sample with p-value  $< 0.05$ .
